# Supplementary material for: Replacement of Chalcone-Ethers with Chalcone-Thioethers as Potent and Highly Selective Monoamine Oxidase-B Inhibitors and Their Protein-Ligand Interactions
Source: MDPI journal article supplement (doi:10.3390/ph14111148), 2021-11-11
Supplement: s1 [file s1]

# Supplementary Materials

## Replacement of Chalcone-Ethers with Chalcone-Thioethers as Potent and Highly Selective Monoamine Oxidase-B Inhibitors and Their Protein-Ligand Interactions

Bijo Mathew <sup>1,\*†</sup>, Jong Min Oh <sup>2,†</sup>, Ahmed Khames <sup>3</sup>, Mohamed A. Abdelgawad <sup>4</sup>, T. M. Rangarajan <sup>5</sup>, Lekshmi R. Nath <sup>6</sup>, Clement Agoni <sup>7</sup>, Mahmoud E. S. Soliman <sup>7</sup>, Githa Elizabeth Mathew <sup>8</sup> and Hoon Kim <sup>2,\*</sup>

<sup>1</sup> Department of Pharmaceutical Chemistry, Amrita School of Pharmacy, Amrita Vishwa Vidyapeetham, AIMS Health Sciences Campus, Kochi-682 041, India

<sup>2</sup> Department of Pharmacy, and Research Institute of Life Pharmaceutical Sciences, Suncheon National University, Suncheon 57922, Korea; [ddazzo005@naver.com](mailto:ddazzo005@naver.com)

<sup>3</sup> Department of Pharmaceutics and Industrial Pharmacy, College of Pharmacy, Taif University, P.O. Box-11099, Taif-21944, Saudi Arabia; [a.khamies@tu.edu.sa](mailto:a.khamies@tu.edu.sa)

<sup>4</sup> Department of Pharmaceutical Chemistry, College of Pharmacy, Jouf University, Sakaka, Al Jouf 72341, Saudi Arabia; [mhmdgwd@ju.edu.sa](mailto:mhmdgwd@ju.edu.sa)

<sup>5</sup> Department of Chemistry, Sri Venketeswara College, University of Delhi, New Delhi-110021, India; [rangarajan93150@gmail.com](mailto:rangarajan93150@gmail.com)

<sup>6</sup> Department of Pharmacognosy, Amrita School of Pharmacy, Amrita Vishwa Vidyapeetham, AIMS Health Sciences Campus, Kochi-682 041, India; [lekshmirnath@aims.amrita.edu](mailto:lekshmirnath@aims.amrita.edu)

<sup>7</sup> Molecular Bio-computation and Drug Design Laboratory, School of Health Sciences, University of KwaZulu-Natal, Westville Campus, Durban 4001, South Africa; [clegoni@gmail.com](mailto:clegoni@gmail.com) (C.A.); [soliman@ukzn.ac.za](mailto:soliman@ukzn.ac.za) (M.E.S.S.)

<sup>8</sup> Department of Pharmacology, Grace College of Pharmacy, Palakkad 678004, India; [githaliz@gmail.com](mailto:githaliz@gmail.com) (G.E.M.)

\* Correspondence: [bijomathew@aims.amrita.edu](mailto:bijomathew@aims.amrita.edu) or [bijovilaventgu@gmail.com](mailto:bijovilaventgu@gmail.com) (B.M.); [hoon@sunchon.ac.kr](mailto:hoon@sunchon.ac.kr) (H.K.)

† These authors contributed equally to this work.

(2E)-1-[4-(methylsulfonyl)phenyl]-3-phenylprop-2-en-1-one (**TM1**):  $^1\text{H}$ -NMR (500 MHz,  $\text{CDCl}_3$ )  $\delta$ : 2.53 (3H, s, S-CH<sub>3</sub>), 7.32–7.30 (2H, d, H 2& H6), 7.43–7.41 (3H, m, H3, H4, H5), 7.53–7.50 (1H, d, J = 15.0 Hz, -CH $\alpha$ ), 7.65–7.63 (2H, d, H3'&H5'), 7.82–7.79 (1H, d, J = 15.0 Hz, -CH $\beta$ ), 7.97–7.95 (2H, d, H2'&H6'). ESI-MS ( $m/z$ ): Calculated- 254.3467, Observed-254.3464.

TM1

1H\_8scan  $\text{CDCl}_3$  {D:\Spectra} nmr 22

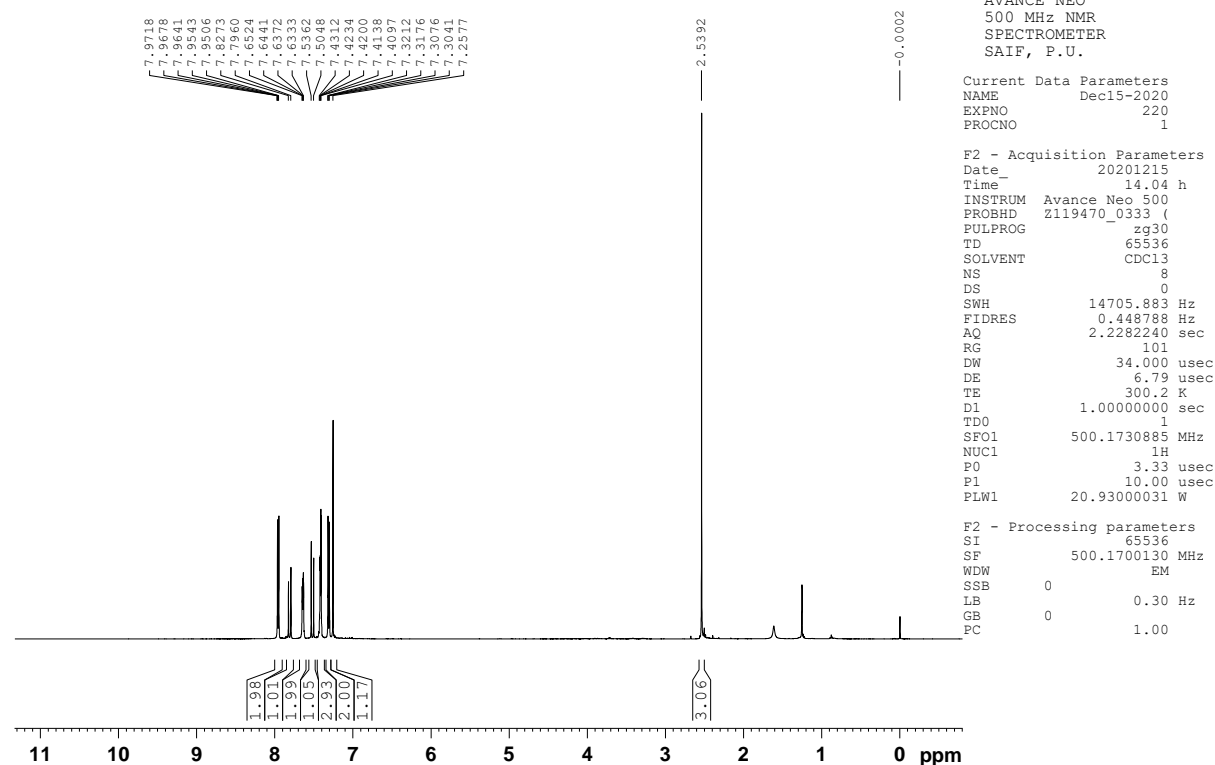

TM1

1H\_8scan  $\text{CDCl}_3$  {D:\Spectra} nmr 22

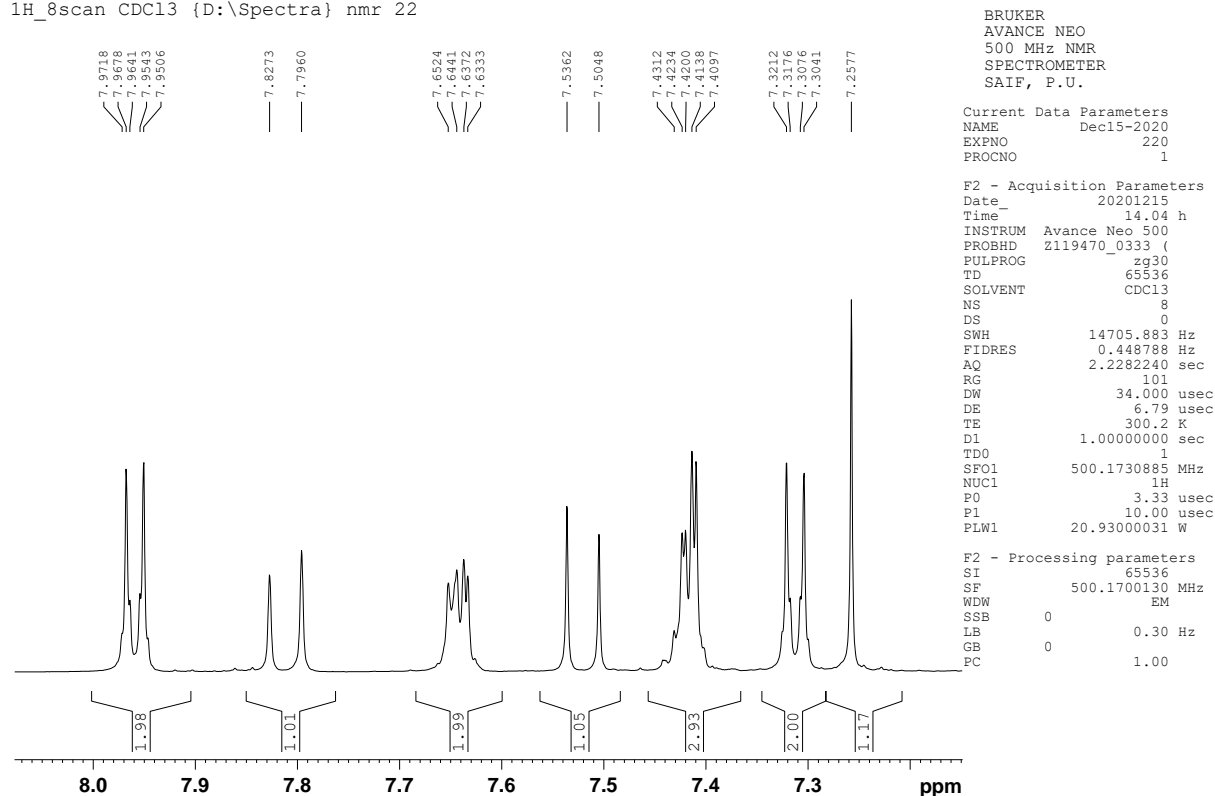

Figure S1. Compound **TM1**  $^1\text{H}$ -NMR spectrum

TM1

Scan: 440 TIC=6061568 Base=21.6%FS #Ions=457 RT=12

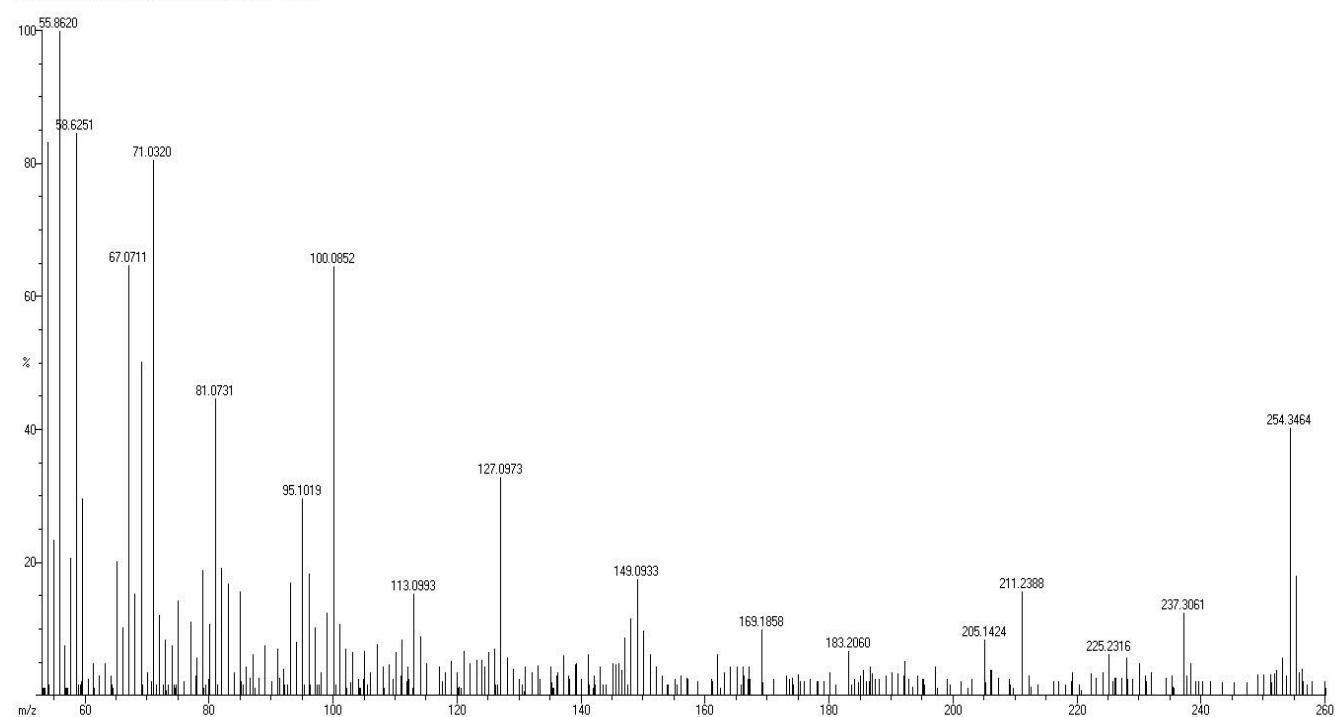

**Figure S2.** Compound **TM1** ESI MS spectrum

(2E)-3-(4-chlorophenyl)-1-[4-(methylsulfonyl)phenyl]prop-2-en-1-one (**TM8**):  $^1\text{H-NMR}$  (400 MHz,  $\text{CDCl}_3$ )  $\delta$ : 2.54 (3H, s, S- $\text{CH}_3$ ), 7.32–7.30 (2H, d, H 2& H6), 7.40–7.38 (3H, m, H3, H4, H5), 7.51–7.47 (1H, d,  $J = 16.0$  Hz,  $-\text{CH}\alpha$ ), 7.58–7.56 (2H, d, H3'&H5'), 7.77–7.73 (1H, d,  $J = 16.0$  Hz,  $-\text{CH}\beta$ ), 7.96–7.94 (2H, d, H2'&H6'). ESI-MS ( $m/z$ ): Calculated- 288.7918, Observed-288.7915.

TM-8 H1  $\text{CDCl}_3$

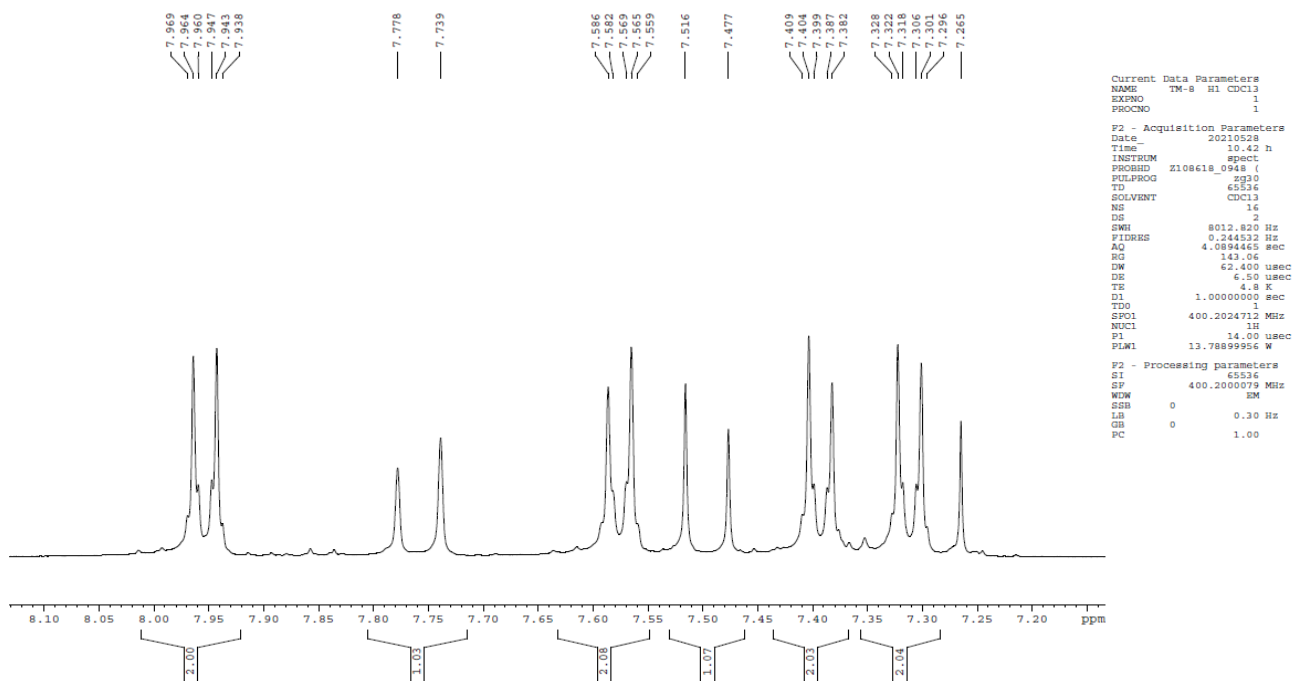

**Figure S3.** Compound **TM8**  $^1\text{H-NMR}$  spectrum

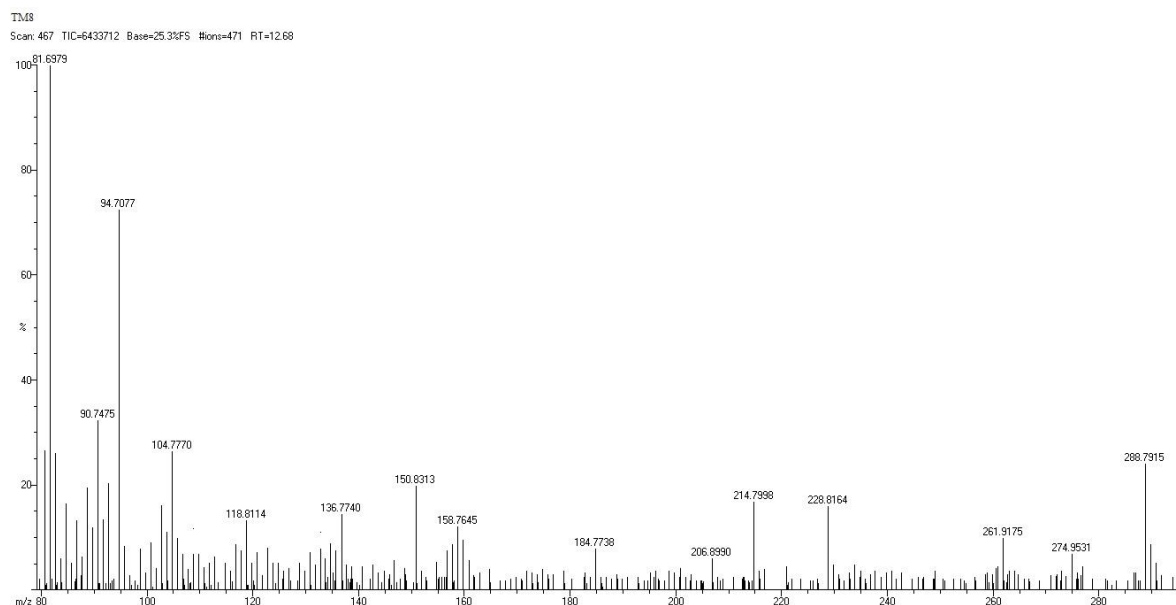

**Figure S4.** Compound **TM8** ESI MS spectrum

(2*E*)-3-(4-bromophenyl)-1-[4-(methylsulfonyl)phenyl]prop-2-en-1-one (**TM9**):  $^1\text{H-NMR}$  (400 MHz,  $\text{CDCl}_3$ )  $\delta$ : 2.54 (3H, s, S- $\text{CH}_3$ ), 7.32–7.30 (2H, d, H 2& H6), 7.51–7.49 (3H, m, H3, H4, H5), 7.55–7.51 (1H, d,  $J = 16.0$  Hz,  $-\text{CH}\alpha$ ), 7.56–7.54 (2H, d, H3'&H5'), 7.76–7.72 (1H, d,  $J = 16.0$  Hz,  $-\text{CH}\beta$ ), 7.96–7.94 (2H, d, H2'&H6'). ESI-MS ( $m/z$ ): Calculated- 333.2428, Observed-333.2425.

TM-9 H1  $\text{CDCl}_3$

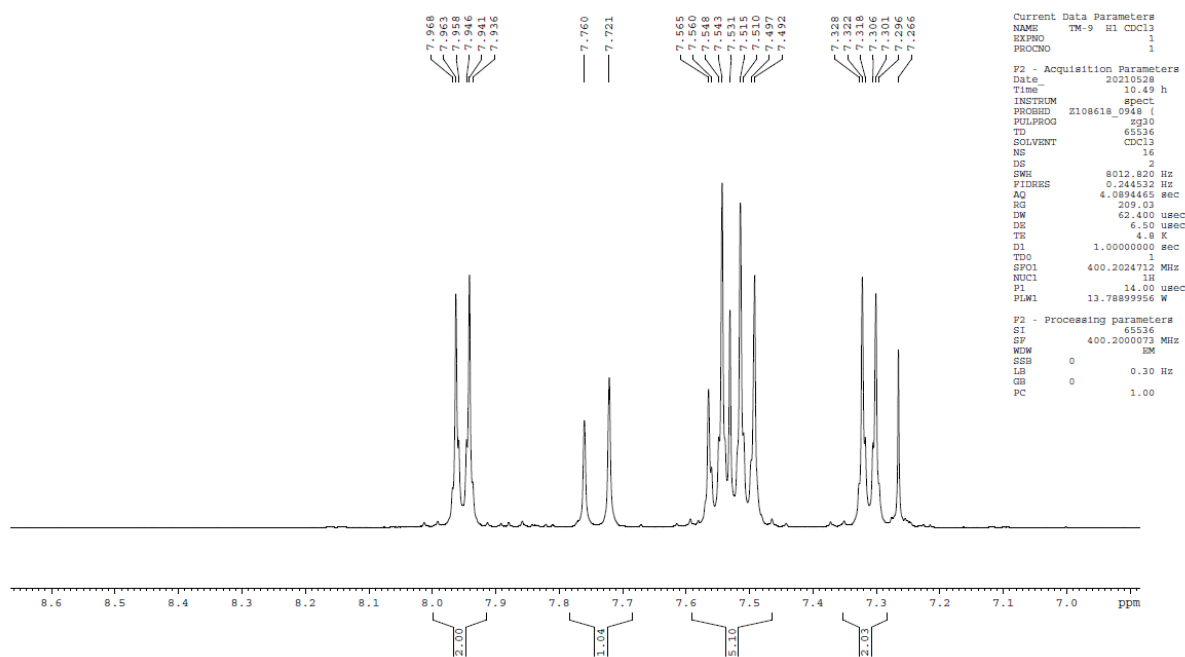

**Figure S5.** Compound **TM9**  $^1\text{H-NMR}$  spectrum

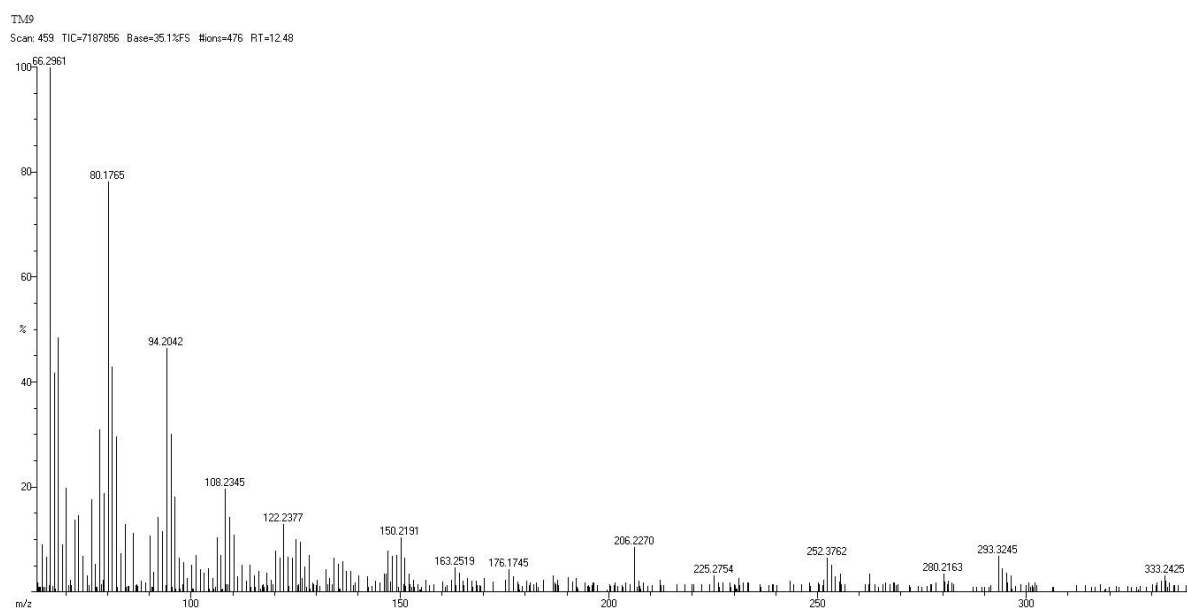

**Figure S6.** Compound **TM8** ESI MS spectrum

(2E)-3-(4-fluorophenyl)-1-[4-(methylsulfonyl)phenyl]prop-2-en-1-one (**TM10**):  $^1\text{H-NMR}$  (400 MHz,  $\text{CDCl}_3$ )  $\delta$ : 2.54 (3H, s, S-CH<sub>3</sub>), 7.13–7.11 (2H, d, H 2& H6), 7.32–7.30 (3H, m, H3, H4, H5), 7.47–7.43 (1H, d, J = 16.0 Hz, -CH $\alpha$ ), 7.65–7.63 (2H, d, H3'&H5'), 7.79–7.75 (1H, d, J = 16.0 Hz, -CH $\beta$ ), 7.96–7.94 (2H, d, H2'&H6'). ESI-MS ( $m/z$ ): Calculated- 272.3372, Observed-272.3370.

TM-10 H1 CDCl3

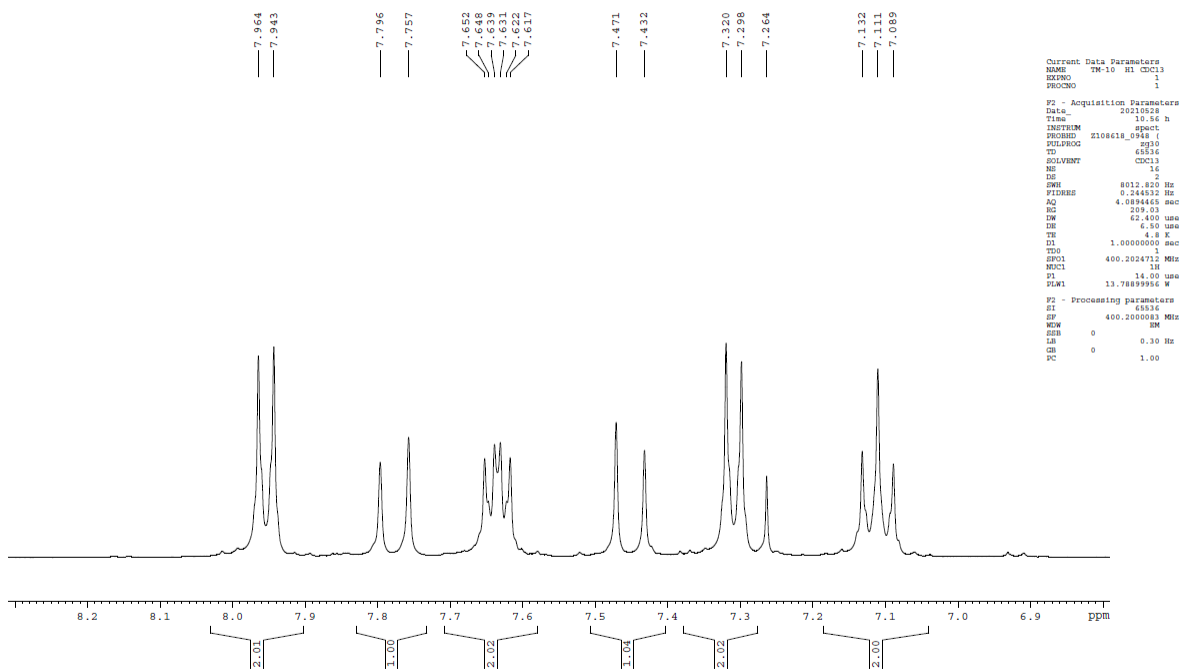

**Figure S7.** Compound **TM10**  $^1\text{H-NMR}$  spectrum

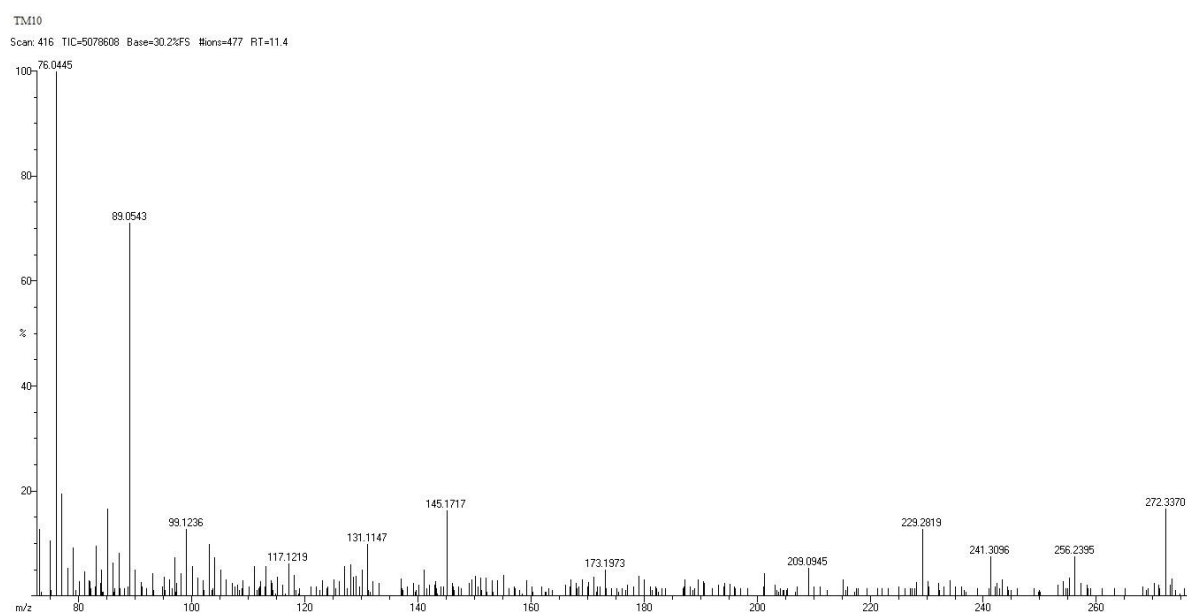

**Figure S8.** Compound **TM10** ESI MS spectrum
